# Supplementary material for: Zinc oxide derived from single source precursor chemistry under chimie douce conditions: formation pathway, defect chemistry and possible applications in thin film printing
Source: Royal Society of Chemistry journal article supplement (doi:10.1039/b816376f), 2009-01-01
Supplement: b816376f.pdf [file b816376f.pdf]

## Zinc oxide derived from single source precursor chemistry under chimie douce conditions: Formation pathway, defect chemistry and possible applications in thin film printing

By Jörg J. Schneider\*, Rudolf C. Hoffmann, Jörg Engstler, Stefan Dilfer, Andreas Klyszcz,  
Emre Erdem, Peter Jakes and Rüdiger A. Eichel

### Supplementary information



**Figure1:** Optical micrographs of printed lines on PET transparencies. Printed lines on substrate at room-temperature (a) parallel and (b) perpendicular to printing direction, printed at room temperature. Printed lines on substrate at 50°C (c) parallel and (d) perpendicular to printing direction.



**Figure 2:** TG with integrated FT-IR intensity (Gram-Schmidt signal) in oxygen of (a) bis(methoxyiminopropanoato)zinc and (b) bis(ethoxyiminopropanoato)zinc.



**Figure3:** FT-IR spectra of gaseous products by decomposition of precursor in oxygen. (a) bis(methoxyiminopropanoato)zinc and (b) bis(ethoxyiminopropanoato)zinc.



**Figure4:** XRD diagrams and corresponding crystallite sizes of films from decomposition of bis(ethoxyiminopropanoato)zinc (12 layers by spincoating on  $2 \times 2 \text{ cm}^2$  substrates) processed at different reaction temperatures.



**Figure5:** Low temperature (10 K) photoluminescence spectrum of ZnO films from decomposition of bis(methoxyiminopropanoato)zinc (25 layers by spincoating on  $1.5 \times 1.5 \text{ cm}^2$  silicon substrates) processed at  $150^\circ\text{C}$ .
